# Supplementary material for: New insights into catalysis for Heck reactions with fine supported Pd particles
Source: Royal Society of Chemistry journal article supplement (doi:10.1039/c9re00480g), 2020-01-01
Supplement: c9re00480g1.pdf [file c9re00480g1.pdf]

Electronic Supplementary Information for

## New insights into catalysis for Heck reactions with fine supported Pd particles

Lin Huang,\* Zhan Wang and Jozel Tan

*Process and Catalysis Research, Institute of Chemical and Engineering Sciences, Agency for Science, Technology and Research, 1 Pesek Road, Jurong Island, Singapore 627833, Singapore*

### Scope of Heck coupling with supported Pd<sup>II</sup> systems

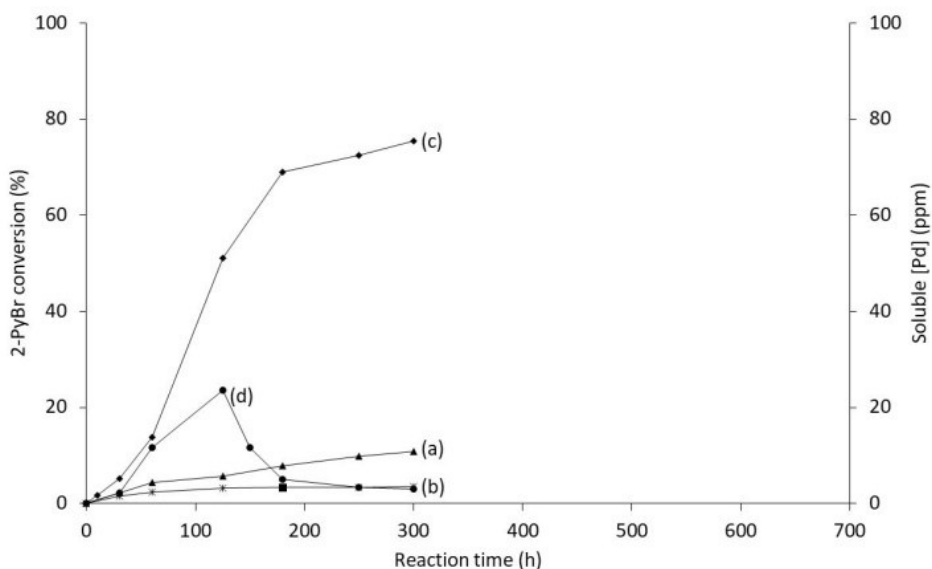

**Fig. S1** Heck coupling profiles of 2-PyBr and styrene with reaction time at 135 °C: (a) 2-PyBr conversion over 1 % Pd<sup>0</sup>/SiO<sub>2</sub>, (b) Pd leaching into solution from 1 % Pd<sup>0</sup>/SiO<sub>2</sub>, (c) 2-PyBr conversion over 1 % Pd<sup>II</sup>/SiO<sub>2</sub> and (d) Pd leaching into solution from 1 % Pd<sup>II</sup>/SiO<sub>2</sub>.

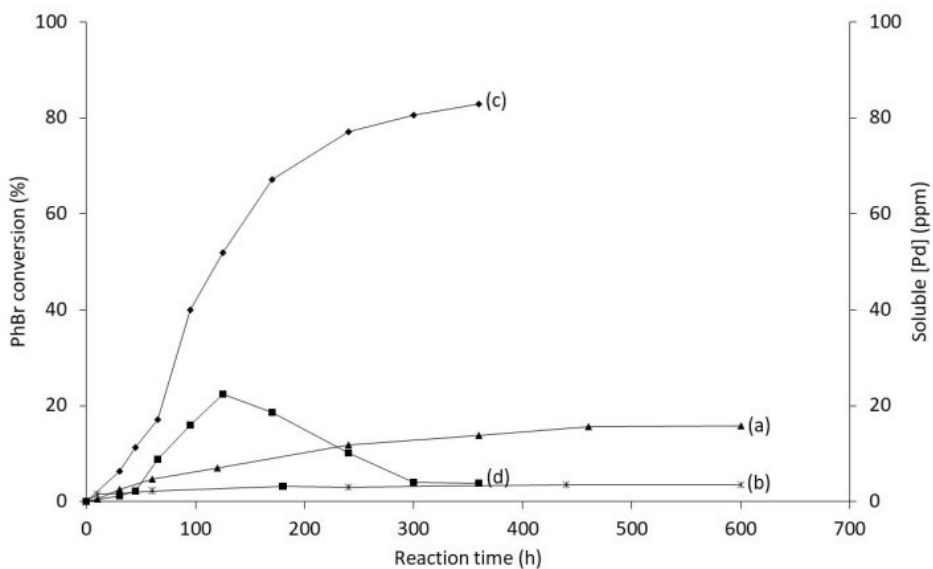

**Fig. S2** Heck coupling profiles of PhBr and methyl acrylate with reaction time at 135 °C: (a) PhBr conversion over 1 % Pd<sup>0</sup>/SiO<sub>2</sub>, (b) Pd leaching into solution from 1 % Pd<sup>0</sup>/SiO<sub>2</sub>, (c) PhBr conversion over 1 % Pd<sup>II</sup>/SiO<sub>2</sub> and (d) Pd leaching into solution from 1 % Pd<sup>II</sup>/SiO<sub>2</sub>.

### Quantitative estimation of true catalytic active species

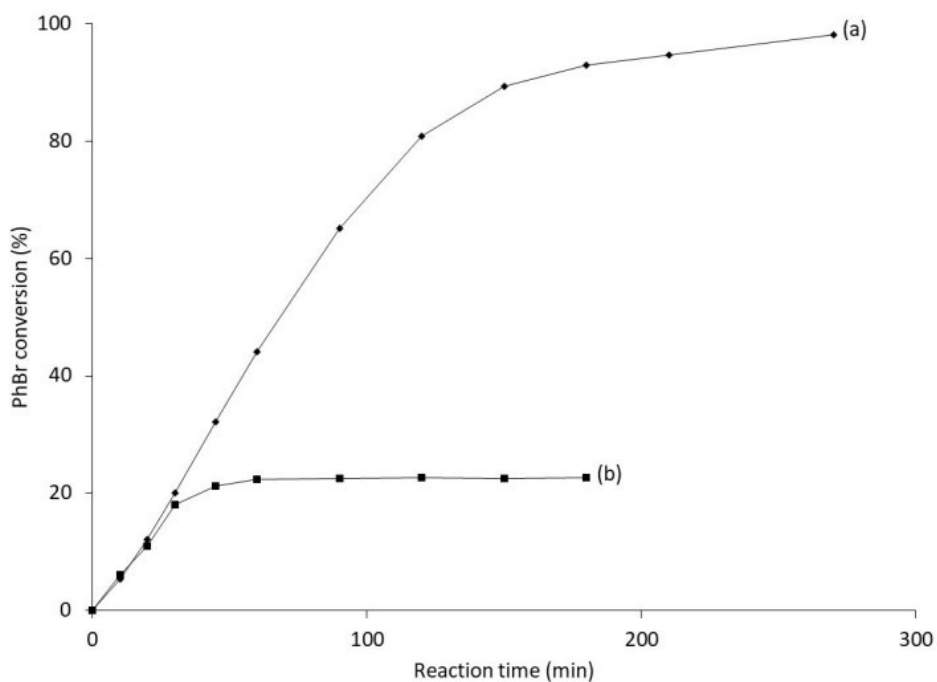

**Fig. S3** Heck coupling profiles of PhBr and styrene with reaction time at 135 °C over (a) 1 % Pd<sup>II</sup>/SiO<sub>2</sub> and (b) 1 % Pd<sup>II</sup>/SiO<sub>2</sub> followed by addition of HS-SiO<sub>2</sub> at 30 min of Heck reaction.

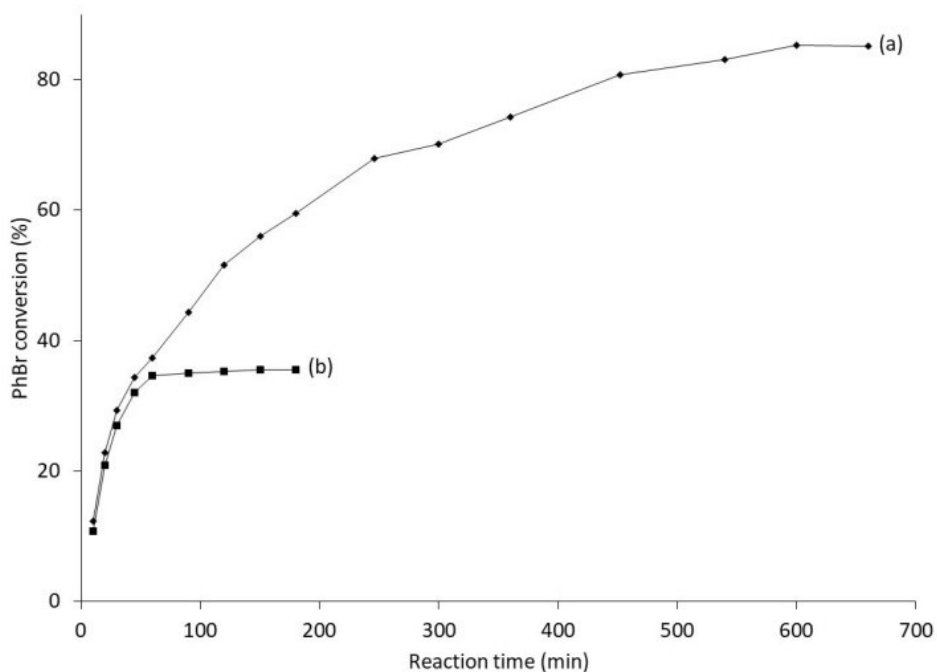

**Fig. S4** Heck coupling profiles of PhBr and styrene with reaction time at 135 °C over (a) 1 % Pd<sup>II</sup>/MgO and (b) 1 % Pd<sup>II</sup>/MgO followed by addition of HS-SiO<sub>2</sub> at 30 min of Heck reaction.

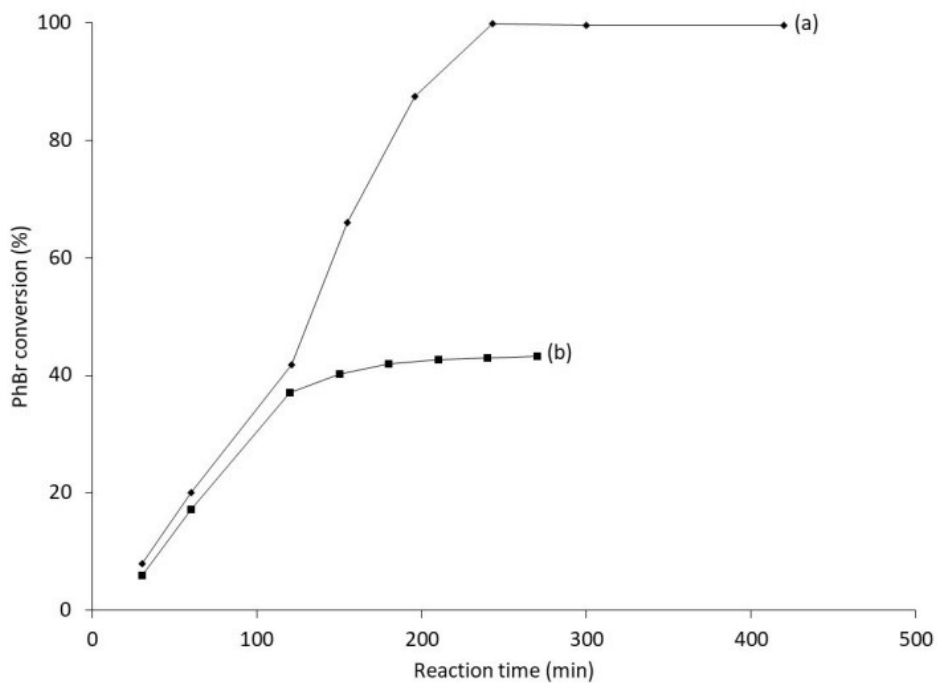

**Fig. S5** Heck coupling profiles of PhBr and styrene with reaction time at 135 °C over (a) 1 % Pd<sup>II</sup>/SBA-15 and (b) 1 % Pd<sup>II</sup>/SBA-15 followed by addition of HS-SiO<sub>2</sub> at 30 min of Heck reaction.

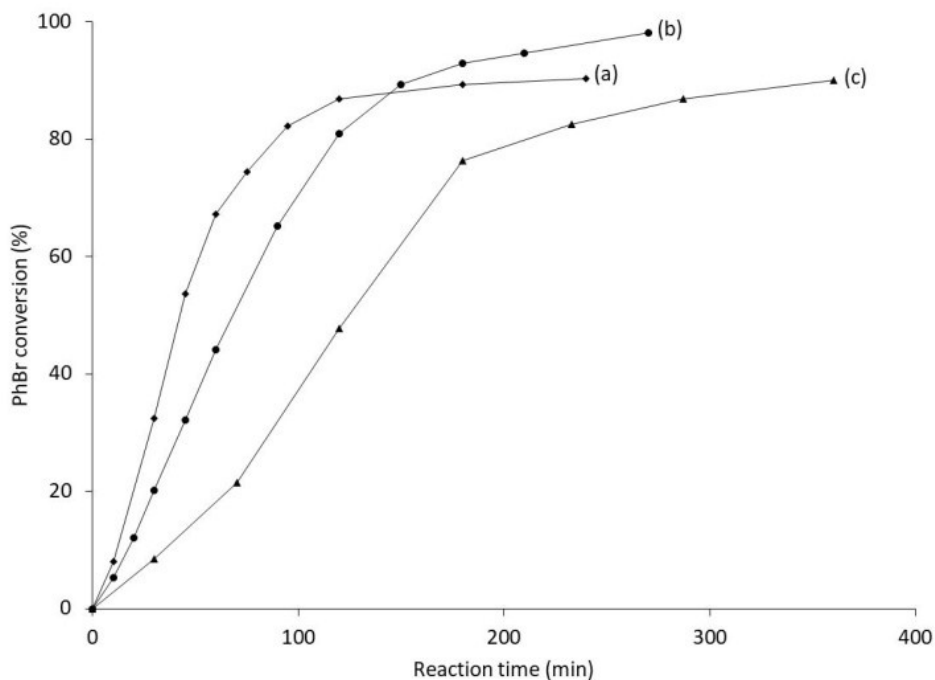

**Fig. S6** PhBr conversion profiles with reaction time in the Heck coupling of PhBr and styrene over Pd<sup>II</sup>/SiO<sub>2</sub> at 135 °C with (a) 0.2 % Pd loading (0.028 mol% Pd), (b) 1 % Pd loading (0.14 mol% Pd) and (c) 4 % Pd loading (0.56 mol% Pd).

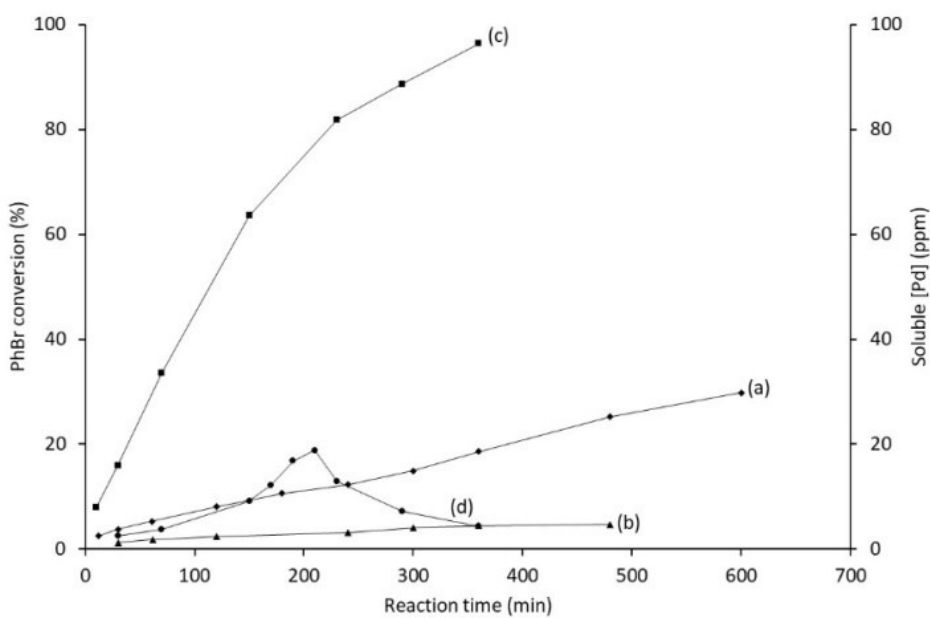

**Fig. S7** Heck coupling profiles of PhBr and styrene with reaction time at 135 °C: (a) PhBr conversion over 1 % Pd<sup>0</sup>/Al<sub>2</sub>O<sub>3</sub>, (b) Pd leaching into solution from 1 % Pd<sup>0</sup>/Al<sub>2</sub>O<sub>3</sub>, (c) PhBr conversion over 1 % Pd<sup>II</sup>/Al<sub>2</sub>O<sub>3</sub> and (d) Pd leaching into solution from 1 % Pd<sup>II</sup>/Al<sub>2</sub>O<sub>3</sub>.

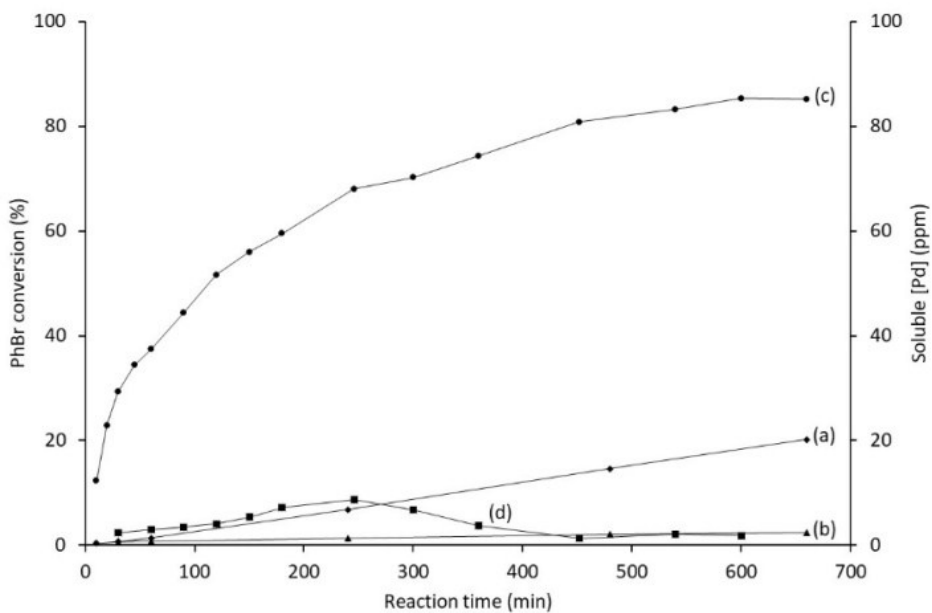

**Fig. S8** Heck coupling profiles of PhBr and styrene with reaction time at 135 °C: (a) PhBr conversion over 1 % Pd<sup>0</sup>/MgO, (b) Pd leaching into solution from 1 % Pd<sup>0</sup>/MgO, (c) PhBr conversion over 1 % Pd<sup>II</sup>/MgO and (d) Pd leaching into solution from 1 % Pd<sup>II</sup>/MgO.

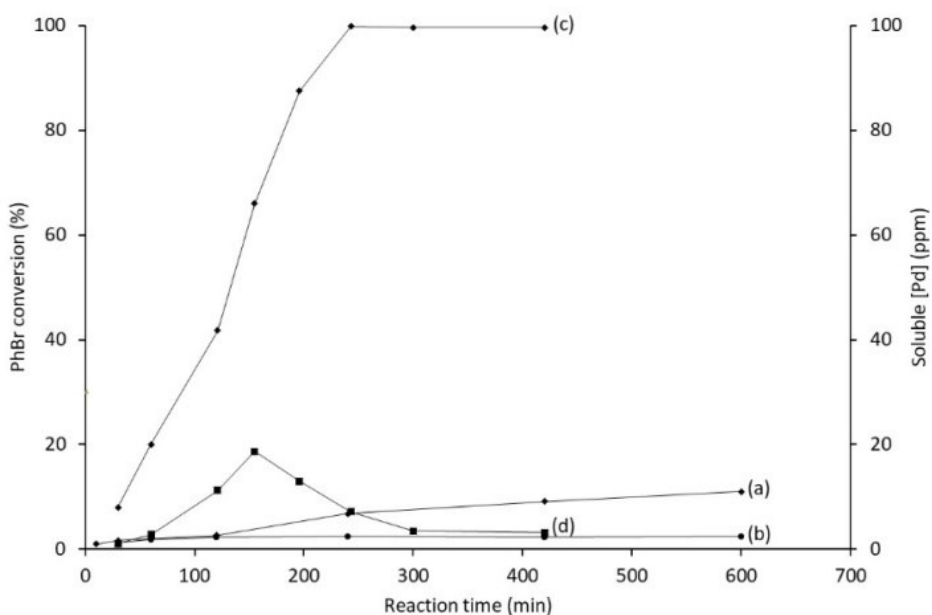

**Fig. S9** Heck coupling profiles of PhBr and styrene with reaction time at 135 °C: (a) PhBr conversion over 1 % Pd<sup>0</sup>/SBA-15, (b) Pd leaching into solution from 1 % Pd<sup>0</sup>/SBA-15, (c) PhBr conversion over 1 % Pd<sup>II</sup>/SBA-15 and (d) Pd leaching into solution from 1 % Pd<sup>II</sup>/SBA-15.

## Catalyst recyclability and Pd leaching to product

**Table S1** Conversions of PhBr and contents of soluble Pd species at the end of Heck coupling of PhBr and styrene over supported Pd<sup>II</sup> systems at 135 °C.<sup>a</sup>

| precatalyst<br>(Pd loading (%))                       | cycle | reaction time (h) | conversion (%) | cumulative TON | soluble [Pd] (ppm) |
|-------------------------------------------------------|-------|-------------------|----------------|----------------|--------------------|
| Pd <sup>II</sup> /SiO <sub>2</sub> (0.2) <sup>b</sup> | 1     | 4                 | 90             | 3214           | 2.4                |
| Pd <sup>II</sup> /SiO <sub>2</sub> (1)                | 1     | 5                 | 89             | 636            | 4.5                |
|                                                       | 2     | 5                 | 87             |                | 3.0                |
|                                                       | 3     | 5                 | 84             |                | 3.0                |
|                                                       | 4     | 5                 | 90             |                | 2.3                |
|                                                       | 5     | 5                 | 89             |                | 2.5                |
|                                                       | 6     | 5.3               | 87             |                | 2.3                |
|                                                       | 7     | 6                 | 68             | 3643           | 2.5                |
| Pd <sup>II</sup> /SiO <sub>2</sub> (4) <sup>c</sup>   | 1     | 8                 | 99             | 177            | 31                 |
|                                                       | 3     | 6.7               | 99             |                | 28                 |
|                                                       | 5     | 5                 | 99             |                | 15                 |
|                                                       | 7     | 8                 | 85             |                | 13                 |
|                                                       | 10    | 7                 | 97             |                | 13                 |
|                                                       | 11    | 7                 | 52             | 1828           |                    |
| Pd <sup>II</sup> /Al <sub>2</sub> O <sub>3</sub> (1)  | 1     | 6                 | 96             | 686            | 4.3                |
|                                                       | 2     | 4                 | 98             |                | 4.0                |
|                                                       | 3     | 11                | 75             | 1922           |                    |
|                                                       | 4     | 11                | 17             | 2043           |                    |
| Pd <sup>II</sup> /MgO (1)                             | 1     | 11                | 85             | 607            | 1.8                |
|                                                       | 2     | 22                | 65             |                | 2.3                |
|                                                       | 3     | 23                | 51             | 1435           |                    |
| Pd <sup>II</sup> /SBA-15 (1)                          | 1     | 3.9               | 100            | 714            | 7.6                |
|                                                       | 2     | 4.5               | 96             |                |                    |
|                                                       | 3     | 6.1               | 99             |                | 6.4                |
|                                                       | 4     | 11                | 88             |                |                    |
|                                                       | 5     | 12                | 70             | 3236           |                    |
|                                                       | 6     | 12                | 12             | 3322           |                    |
| Pd <sup>II</sup> /TiO <sub>2</sub> (1)                | 1     | 9                 | 98             | 700            | 4.7                |
|                                                       | 3     | 16                | 82             |                | 4.5                |
|                                                       | 5     | 16                | 99             |                | 4.7                |
|                                                       | 9     | 17                | 80             | 5377           | 4.1                |
| Pd <sup>II</sup> /ZrO <sub>2</sub> (1)                | 1     | 6                 | 99             | 707            | 4.1                |
|                                                       | 3     | 6                 | 99             |                | 4.8                |
|                                                       | 5     | 16                | 94             |                | 4.2                |
|                                                       | 7     | 16                | 76             | 3715           |                    |

<sup>a</sup> 0.14 mol% Pd, 10 mmol of PhBr, 15 mmol of styrene, 5 mmol of Na<sub>2</sub>CO<sub>3</sub>, 10 ml of DMA. <sup>b</sup> 0.028 mol% Pd. <sup>c</sup> 0.56 mol% Pd.

**Table S2** Conversions of alternative aryl bromides and contents of soluble Pd species at the end of Heck couplings over 1 % Pd<sup>II</sup>/SiO<sub>2</sub> at 135 °C.<sup>a</sup>

| substrates                  | cycle | reaction time (h) | conversion (%) | cumulative TON | soluble [Pd] (ppm) |
|-----------------------------|-------|-------------------|----------------|----------------|--------------------|
| 2-PyBr + styrene            | 1     | 5                 | 75             | 536            | 3.5                |
|                             | 2     | 5                 | 77             |                | 3.7                |
|                             | 3     | 5                 | 75             |                | 3.8                |
|                             | 4     | 5                 | 76             |                | 3.4                |
| 4-BrPhOMe + styrene         | 1     | 5                 | 93             | 664            | 4.2                |
|                             | 2     | 4                 | 92             |                | 4.7                |
|                             | 3     | 5                 | 87             |                | 4.5                |
|                             | 4     | 6                 | 85             |                | 4.8                |
| PhBr + methyl acrylate      | 1     | 6                 | 83             | 593            | 4.3                |
|                             | 2     | 12                | 85             |                | 4.8                |
|                             | 3     | 5                 | 77             |                | 4.8                |
|                             | 4     | 8                 | 71             |                | 2257               |
| 4-BrPhOMe + methyl acrylate | 1     | 6                 | 78             | 557            | 4.8                |
|                             | 2     | 6                 | 80             |                | 4.6                |
|                             | 3     | 8                 | 74             |                | 4.6                |
|                             | 4     | 8                 | 70             |                | 2157               |

<sup>a</sup> 0.14 mol% Pd, 10 mmol of aryl bromide, 15 mmol of olefin, 5 mmol of Na<sub>2</sub>CO<sub>3</sub>, 10 ml of DMA.

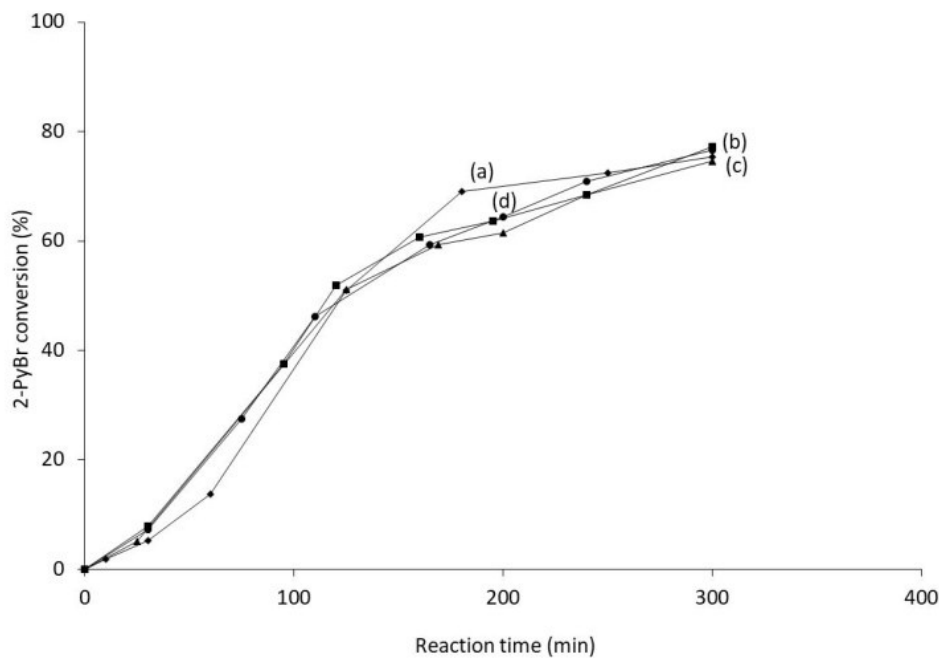

**Fig. S10** 2-PyBr conversion profiles with reaction time in the Heck coupling of 2-PyBr and styrene at 135 °C over 1 % Pd<sup>II</sup>/SiO<sub>2</sub>: (a)-(d) Heck reaction cycles 1-4.

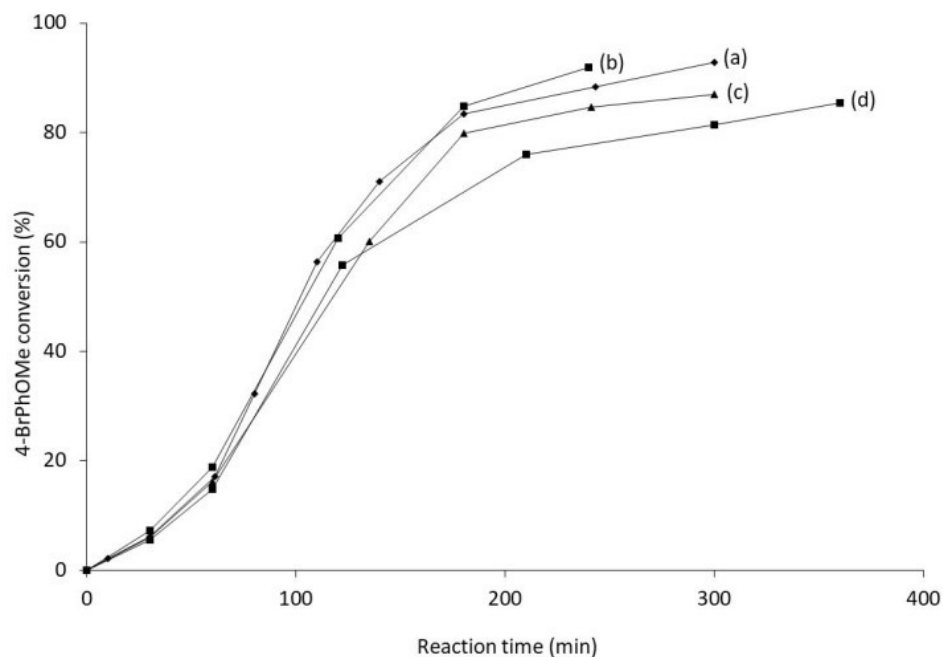

**Fig. S11** 4-BrPhOMe conversion profiles with reaction time in the Heck coupling of 4-BrPhOMe and styrene at 135 °C over 1 % Pd<sup>II</sup>/SiO<sub>2</sub>: (a)-(d) Heck reaction cycles 1-4.

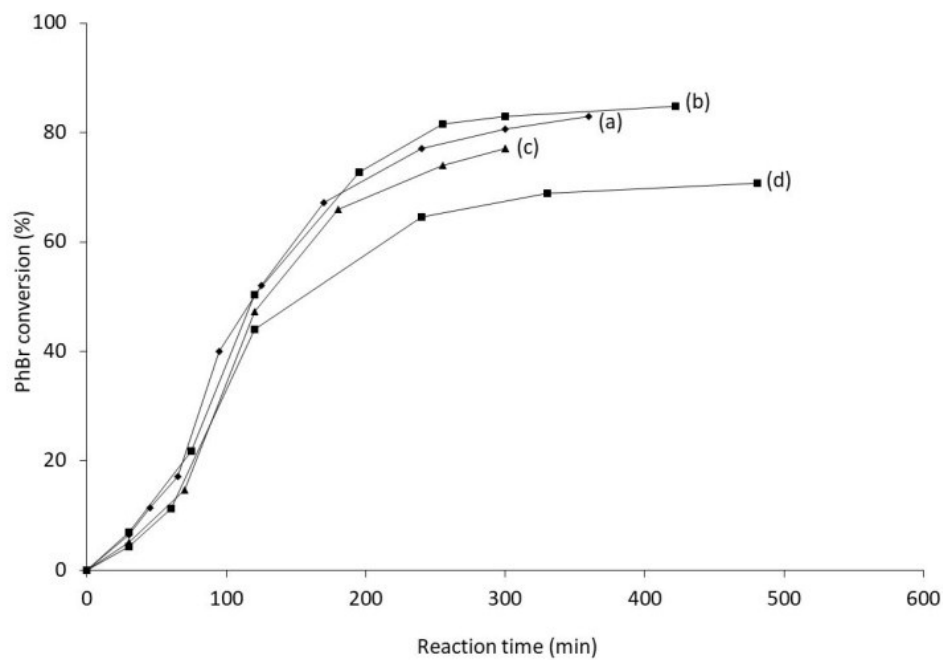

**Fig. S12** PhBr conversion profiles with reaction time in the Heck coupling of PhBr and methyl acrylate at 135 °C over 1 % Pd<sup>II</sup>/SiO<sub>2</sub>: (a)-(d) Heck reaction cycles 1-4.



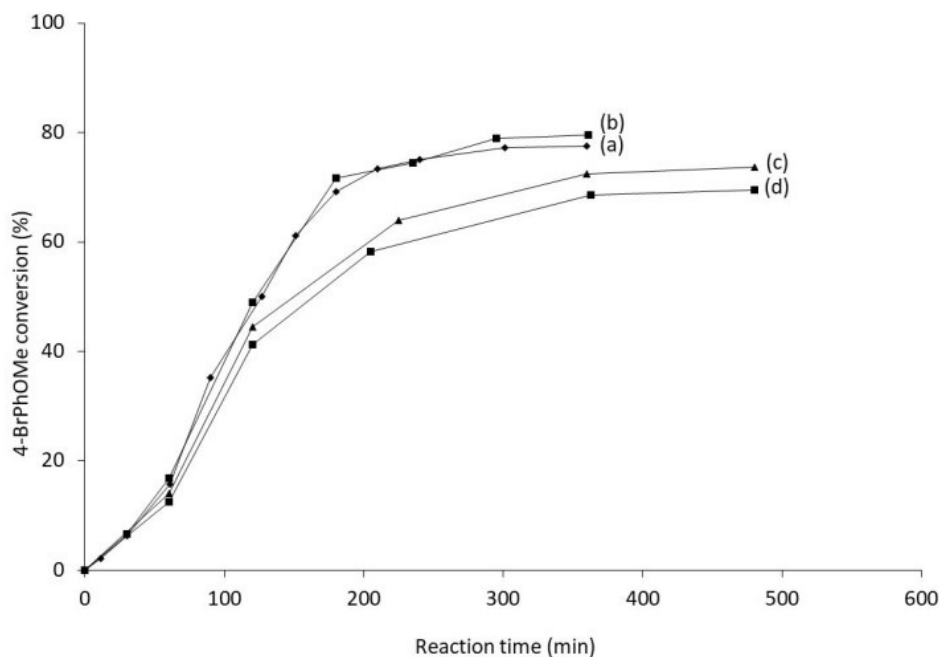

Fig. S13 4-BrPhOMe conversion profiles with reaction time in the Heck coupling of 4-BrPhOMe and methyl acrylate at 135 °C over 1 % Pd<sup>II</sup>/SiO<sub>2</sub>: (a)-(d) Heck reaction cycles 1-4.

### Physical properties of supports and precatalysts

Table S3 Physical properties of supports and precatalysts determined from N<sub>2</sub> adsorption-desorption

| support or precatalyst                           | Pd loading (%) | BET surface area (m <sup>2</sup> g <sup>-1</sup> ) | pore volume (ml g <sup>-1</sup> ) |
|--------------------------------------------------|----------------|----------------------------------------------------|-----------------------------------|
| SiO <sub>2</sub>                                 | –              | 312                                                | 1.0                               |
| Pd <sup>0</sup> /SiO <sub>2</sub>                | 0.2            | 309                                                | 0.95                              |
| Pd <sup>0</sup> /SiO <sub>2</sub>                | 1              | 306                                                | 0.94                              |
| Pd <sup>0</sup> /SiO <sub>2</sub>                | 4              | 301                                                | 0.92                              |
| Pd <sup>II</sup> /SiO <sub>2</sub>               | 0.2            | 277                                                | 0.97                              |
| Pd <sup>II</sup> /SiO <sub>2</sub>               | 1              | 277                                                | 0.96                              |
| Pd <sup>II</sup> /SiO <sub>2</sub>               | 4              | 274                                                | 0.94                              |
| Al <sub>2</sub> O <sub>3</sub>                   | –              | 163                                                | 0.32                              |
| Pd <sup>0</sup> /Al <sub>2</sub> O <sub>3</sub>  | 1              | 161                                                | 0.27                              |
| Pd <sup>II</sup> /Al <sub>2</sub> O <sub>3</sub> | 1              | 153                                                | 0.25                              |
| MgO                                              | –              | 10.5                                               | 0.09                              |
| Pd <sup>0</sup> /MgO                             | 1              | 27.5                                               | 0.09                              |
| Pd <sup>II</sup> /MgO                            | 1              | 15.4                                               | 0.09                              |
| SBA-15                                           | –              | 684                                                | 1.1                               |
| Pd <sup>0</sup> /SBA-15                          | 1              | 612                                                | 0.95                              |
| Pd <sup>II</sup> /SBA-15                         | 1              | 534                                                | 0.84                              |
| TiO <sub>2</sub>                                 | –              | 4.3                                                | 0.01                              |
| Pd <sup>0</sup> /TiO <sub>2</sub>                | 1              | 5.1                                                | 0.01                              |
| Pd <sup>II</sup> /TiO <sub>2</sub>               | 1              | 4.2                                                | 0.01                              |
| ZrO <sub>2</sub>                                 | –              | 5.0                                                | 0.02                              |
| Pd <sup>0</sup> /ZrO <sub>2</sub>                | 1              | 5.6                                                | 0.02                              |
| Pd <sup>II</sup> /ZrO <sub>2</sub>               | 1              | 4.2                                                | 0.02                              |
